# Supplementary material for: Plant-Derived Nutraceuticals Involved in Body Weight Control by Modulating Gene Expression
Source: MDPI journal article supplement (doi:10.3390/plants12122273), 2023-06-11
Supplement: s1 [file s1]

# Supplementary Material

**Table S1.** Epigenetic modifications induced by nutraceuticals in relation to obesity

| Nutraceutical                     | Model                      | Effects                                                                                    | Targeted genes or pathways                       | Gut microbiota                                                                  | miR                                                        | Study                        |
|-----------------------------------|----------------------------|--------------------------------------------------------------------------------------------|--------------------------------------------------|---------------------------------------------------------------------------------|------------------------------------------------------------|------------------------------|
| Resveratrol                       | Humans                     | Modulation of mitochondrial activity                                                       | AMPK ↑<br>SIRT-1 ↑                               | <i>Bacteroidetes/Firmicutes</i> ratio ↑                                         |                                                            |                              |
|                                   | In vitro and animal models | Glucose homeostasis                                                                        | CCAAT-C/EBPα ↓                                   |                                                                                 |                                                            |                              |
|                                   |                            | decrease adipogenesis<br>increase thermogenesis                                            | UCP1 ↑<br>FNDC5 ↑                                | <i>Lactobacillus</i> ↑                                                          | miR-211-3p ↑<br>miR-1224 ↑<br>miR-539-5p ↑<br>miR-511-3p ↓ | 61, 63-70,<br>75, 78         |
|                                   |                            | Reducing of fat accumulation                                                               | SREBPs ↓                                         | <i>Bifidobacterium</i> ↑                                                        |                                                            |                              |
|                                   |                            | Stimulation of browning process                                                            | FIAF ↑                                           |                                                                                 |                                                            |                              |
|                                   |                            | Reduction of body weight                                                                   | LPL ↓                                            | <i>Enterococcus faecalis</i> ↓                                                  |                                                            |                              |
|                                   |                            | Reduction of subcutaneous adipose tissue                                                   | PKA/LKB1/AMPK ↑                                  |                                                                                 |                                                            |                              |
|                                   |                            | Protection against sarcopenic obesity                                                      |                                                  |                                                                                 |                                                            |                              |
| Curcumin                          | Humans                     |                                                                                            |                                                  | <i>Bacteroidaceae</i> ↑<br><i>Prevotellaceae</i> ↓                              |                                                            |                              |
|                                   | In vitro and animal models | Antiadipogenic                                                                             | C/EBPα ↓<br>KLF5 ↓<br>PPARγ ↓<br>aP2 ↓<br>MAPK ↑ | <i>Rikenellaceae</i> ↑<br><i>Anaerotruncus</i> ↓<br><i>Exiguobacterium</i> ↑    |                                                            |                              |
|                                   |                            | Anti-inflammatory                                                                          | STAT3 ↓<br>IL-1β ↓                               | <i>Helicobacter</i> ↓                                                           | miR-17-5p ↑                                                | 82, 83,<br>85-101            |
|                                   |                            | Increase thermogenesis and energy expenditure                                              | UCP1 ↑                                           | <i>Shewanella</i> ↑<br><i>Serratia</i> ↑                                        |                                                            |                              |
|                                   |                            | Reduces insulin resistance                                                                 | STAT3 ↓                                          | <i>Lactococcus</i> ↑<br><i>Turicibacter</i> ↑<br><i>Parasutterella genera</i> ↑ |                                                            |                              |
|                                   |                            |                                                                                            |                                                  |                                                                                 |                                                            |                              |
|                                   |                            |                                                                                            |                                                  |                                                                                 |                                                            |                              |
|                                   |                            |                                                                                            |                                                  |                                                                                 |                                                            |                              |
| Ginger                            | Humans                     | Antiadipogenic                                                                             | C/EBPα ↓<br>PPARγ ↓<br>aP2 ↓<br>FAS ↓            | <i>Firmicutes/Bacteroidetes</i> ratio ↑                                         |                                                            |                              |
|                                   | In vitro and animal models |                                                                                            | AKT/GSK3 ↓                                       | <i>Proteobacteria</i> ↑<br><i>Ruminococcus</i> ↓                                |                                                            |                              |
|                                   |                            | Anti-inflammatory and hypoglycemic                                                         | TNFα ↓<br>IL6 ↓                                  |                                                                                 | miR-21 ↓<br>miR-132 ↓                                      | 115-129,<br>133, 136,<br>139 |
|                                   |                            | Reduction of hepatic lipid accumulation                                                    | FGF2 ↑<br>CPT1 ↑<br>ACOX1 ↑<br>UCP1 ↑            |                                                                                 |                                                            |                              |
|                                   |                            |                                                                                            |                                                  |                                                                                 |                                                            |                              |
|                                   |                            |                                                                                            |                                                  |                                                                                 |                                                            |                              |
|                                   |                            | Increase thermogenesis and energy expenditure, reduce body weight and waist circumferences |                                                  |                                                                                 |                                                            |                              |
|                                   |                            |                                                                                            |                                                  |                                                                                 |                                                            |                              |
| Epigallocatechin-3-gallate (EGCG) | Humans                     | Antibesity                                                                                 | AMPK ↑                                           | <i>Bacteroides</i> ↑                                                            | miR-1297 ↓                                                 |                              |
|                                   | In vitro and animal models | Increases lipolysis and lipid oxidation                                                    | HSL ↑                                            | <i>Parasutterella</i> ↑                                                         | miR-373-3p ↓<br>miR-192-5p ↓                               |                              |

|                                                        |                                            |                                                                   |                                                   |                                                                                                        |                                              |                                                     |                                                                 |                     |
|--------------------------------------------------------|--------------------------------------------|-------------------------------------------------------------------|---------------------------------------------------|--------------------------------------------------------------------------------------------------------|----------------------------------------------|-----------------------------------------------------|-----------------------------------------------------------------|---------------------|
|                                                        |                                            | Enhances basal metabolism                                         | ATGL ↑                                            | <i>Allobaculum</i> ↓                                                                                   | miR-1266-5p ↓<br>miR-595 ↓                   | 142-148<br>153-157                                  |                                                                 |                     |
|                                                        |                                            | Decreases weight gain                                             | ACOD2 ↑                                           | <i>Roseburia</i> ↓                                                                                     |                                              |                                                     |                                                                 |                     |
|                                                        |                                            | Decreases adipose tissue weight                                   | PPAR $\gamma$ ↑                                   | <i>Erysipelotrichaceae</i> ↓                                                                           |                                              |                                                     |                                                                 |                     |
|                                                        |                                            | Decreases calorie intake                                          | MCAD ↑<br>UCP3 ↑<br>NRF1 ↑<br>COX-2 ↓             | <i>Lachnospiraceae</i> ↓<br><i>Ruminococcaceae</i> ↓<br><i>Anaerotruncus</i> ↓<br><i>Odoribacter</i> ↓ |                                              |                                                     |                                                                 |                     |
|                                                        |                                            | Suppresses liver inflammation                                     | iNOS ↓<br>DRP1 ↓                                  | <i>Enterorhadus</i> ↓<br><i>Lachnospiraceae</i> ↓                                                      |                                              |                                                     |                                                                 |                     |
|                                                        |                                            | Amelioration of muscle autophagy in diabetes                      | Beclin1 ↓                                         | <i>Akkermansia</i> ↑                                                                                   |                                              |                                                     |                                                                 |                     |
|                                                        |                                            | Improvement in insulin sensitivity and lipid profile              | PPARG $\alpha$ ↑                                  | <i>Christensenellaceae</i> ↑<br><i>Bifidobacterium</i> ↑<br><i>Fusobacterium varium</i> ↓              |                                              |                                                     |                                                                 |                     |
|                                                        | GLUT4 ↑                                    |                                                                   |                                                   |                                                                                                        |                                              |                                                     |                                                                 |                     |
|                                                        | LPL ↑                                      |                                                                   | <i>Enterobacteriaceae</i> ↓<br><i>Bilophila</i> ↓ |                                                                                                        |                                              |                                                     |                                                                 |                     |
|                                                        | Capsaicin                                  | Humans<br>In vitro and animal models                              | Antiobesity induce body weight reduction          | LEP ↓<br>PPAR $\gamma$ ↓                                                                               | <i>Akkermansia</i> ↑<br><i>Bacteroides</i> ↑ |                                                     | mmu-let-7a-5p ↑<br>mmu-let-7d-5p ↑<br>mmu-let7b-3p ↑<br>165-179 |                     |
|                                                        |                                            |                                                                   | Improves lipolysis in adipocytes                  | C/EBP- $\alpha$ ↓<br>PPAR $\alpha$ ↑                                                                   | <i>Prevotella</i> ↑<br><i>Allobaculum</i> ↑  |                                                     |                                                                 |                     |
|                                                        |                                            |                                                                   | Increases energy expenditure                      | PGC-1 $\alpha$ ↑<br>TRPV-1 ↓                                                                           | <i>Odoribacter</i> ↑<br><i>Coprococcus</i> ↑ |                                                     |                                                                 |                     |
|                                                        |                                            |                                                                   | Increases satiety                                 | ADIPOQ ↑<br>UCP1 ↑                                                                                     | SCFAs ↑<br>Acetate concentrations ↑          |                                                     |                                                                 |                     |
| Decreases the desire to eat                            |                                            |                                                                   | SIRT-1 ↑<br>BMP8b ↑                               | Propionate concentrations ↑                                                                            |                                              |                                                     |                                                                 |                     |
| Improves glucose intolerance                           |                                            |                                                                   | PGC-1 $\alpha$ ↑                                  |                                                                                                        |                                              |                                                     |                                                                 |                     |
| Increases thermogenesis and improves cholesterol level |                                            |                                                                   | BDNF ↑<br>PRMD16 ↑                                | <i>Escherichia</i> ↓<br><i>Desulfovibrio</i> ↓                                                         |                                              |                                                     |                                                                 |                     |
| Conversion of white/beige cells into brown adipocytes  |                                            |                                                                   | FOXC2 ↑<br>NCOA1 ↑<br>DIO2 ↑                      | <i>Sutterella</i> ↓<br><i>Helicobacter</i> ↓                                                           |                                              |                                                     |                                                                 |                     |
|                                                        |                                            |                                                                   | SIRT1 ↑                                           |                                                                                                        |                                              |                                                     |                                                                 |                     |
| Caffeine                                               |                                            |                                                                   | Humans<br>In vitro and animal models              | Anti-obesity                                                                                           | PI3K/AKT activity ↓                          | <i>Firmicutes</i> / <i>Bacteroidetes</i> ratio ↑    |                                                                 | 191-199<br>200, 201 |
|                                                        |                                            |                                                                   |                                                   | Reduces food intake                                                                                    | PPAR $\gamma$ ↓                              |                                                     |                                                                 |                     |
|                                                        |                                            |                                                                   |                                                   | Increases energy expenditure                                                                           | UCP1 ↑                                       | <i>Bifidobacterium spp</i> ↑<br><i>Prevotella</i> ↑ |                                                                 |                     |
|                                                        |                                            |                                                                   |                                                   | Anti-adipogenic<br>Reduces adipocytes number                                                           | FAS ↓<br>CCAAT-C/EBP $\alpha$ ↓              | <i>Porphyromonas</i> ↑                              |                                                                 |                     |
|                                                        | Improves dyslipidemia<br>Anti-inflammatory | C/EBP $\beta$ ↓<br>SREBP-1<br>TNF $\alpha$ ↓<br>MCP-1 ↓<br>IL-6 ↓ |                                                   |                                                                                                        |                                              |                                                     |                                                                 |                     |
